# Supplementary material
Source: PubMed Central journal article supplement (PMC7280014)

## **Plasmin improves oedematous blood-gas barrier by cleaving epithelial sodium channels**

Runzhen Zhao<sup>1</sup>, Gibran Ali<sup>1</sup>, Hong-Guang Nie<sup>1, 2</sup>, Yongchang Chang<sup>3</sup>, Deepa Bhattarai<sup>1, #</sup>, Xuefeng Su<sup>1</sup>, Xiaoli Zhao<sup>4</sup>, Michael A. Matthay<sup>5, \*</sup>, Hong-Long Ji<sup>1, 6, \*</sup>

<sup>1</sup>Department of Cellular and Molecular Biology, University of Texas Health Science Center at Tyler, Tyler, Texas 75708, USA; <sup>2</sup>College of Basic Medical Science, China Medical University, Shenyang, Liaoning 110001, China; <sup>3</sup>Barrow Neurological Institute, 350 West Thomas Road, Phoenix, Arizona 85013-4409, USA; <sup>4</sup>Department of Physiological Sciences, Eastern Virginia Medical School, Norfolk, Virginia 23501, USA; <sup>5</sup>Department of Anesthesia and Medicine, University of California San Francisco, San Francisco, California, USA; <sup>6</sup>Texas Lung Injury Institute, University of Texas Health Science Center at Tyler, Tyler, Texas 75708, USA

**FIGURE S1-7.** Online supplementary figures are the representative MS/MS spectrum for the peptide fragments in Figure 8.

**Figure S1**

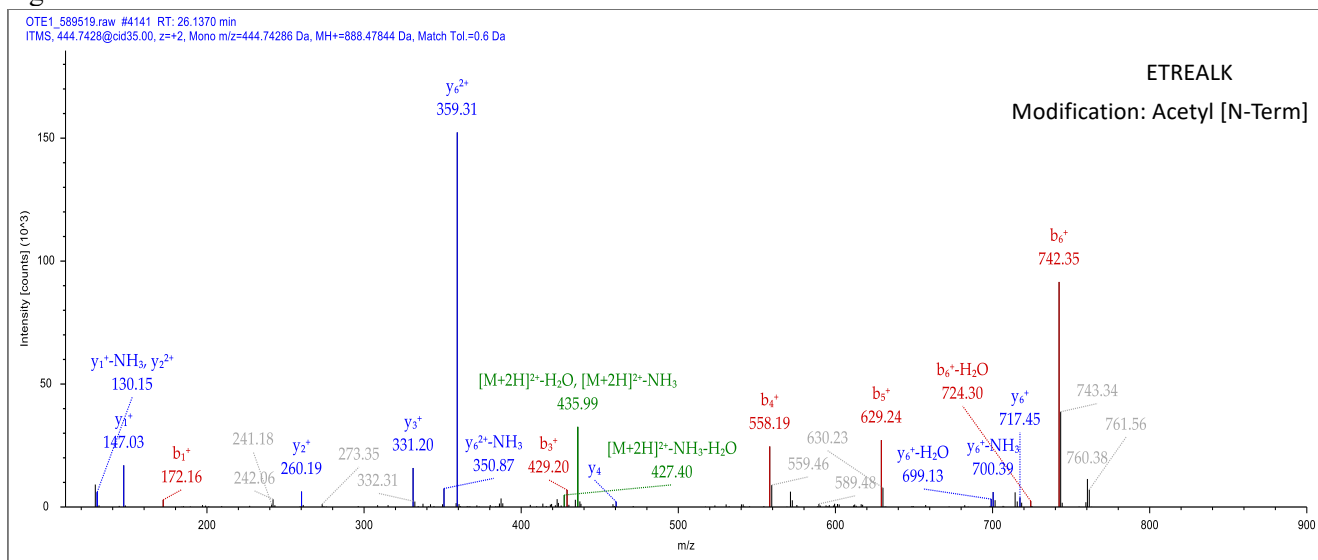

**Figure S2**

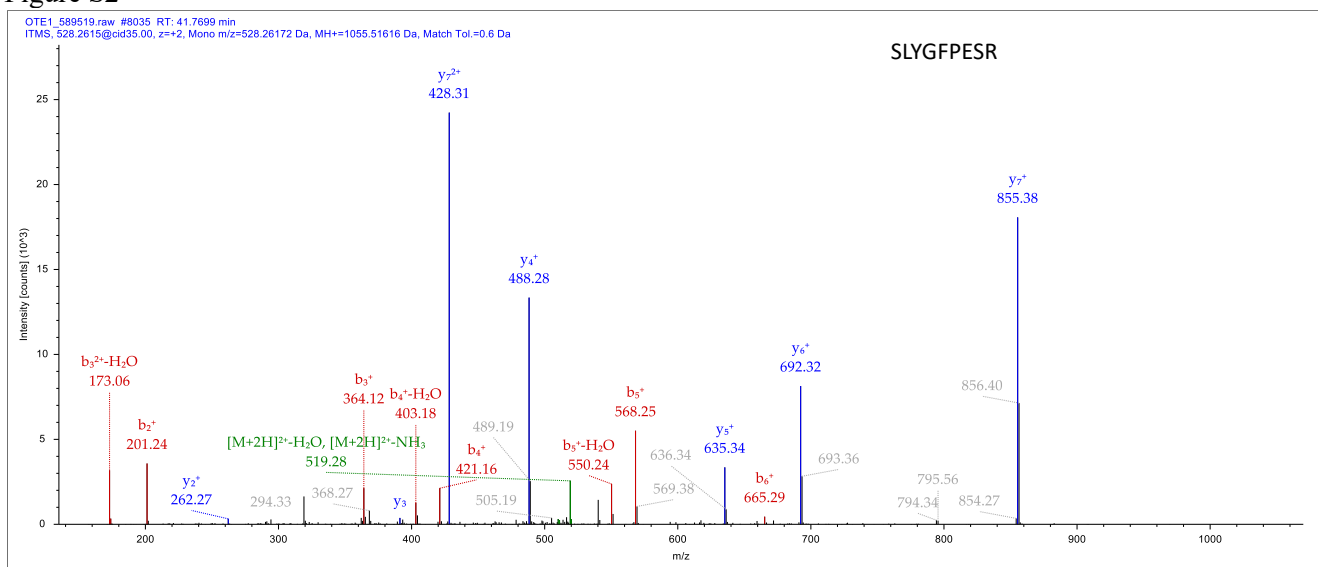

Figure S3

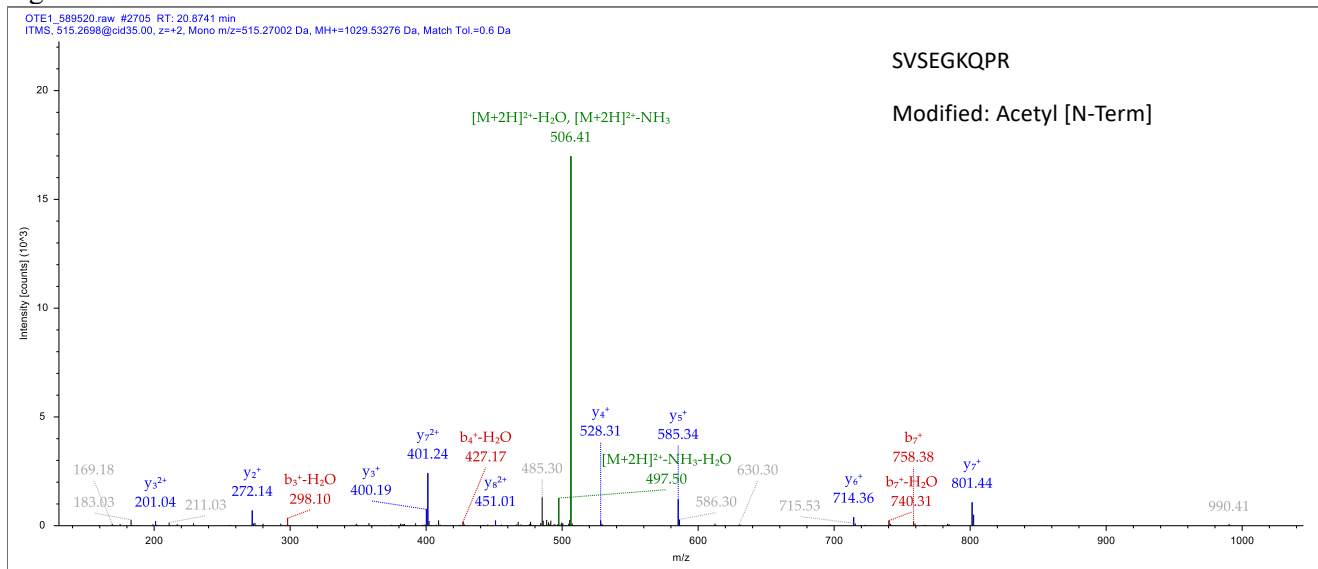

Figure S4

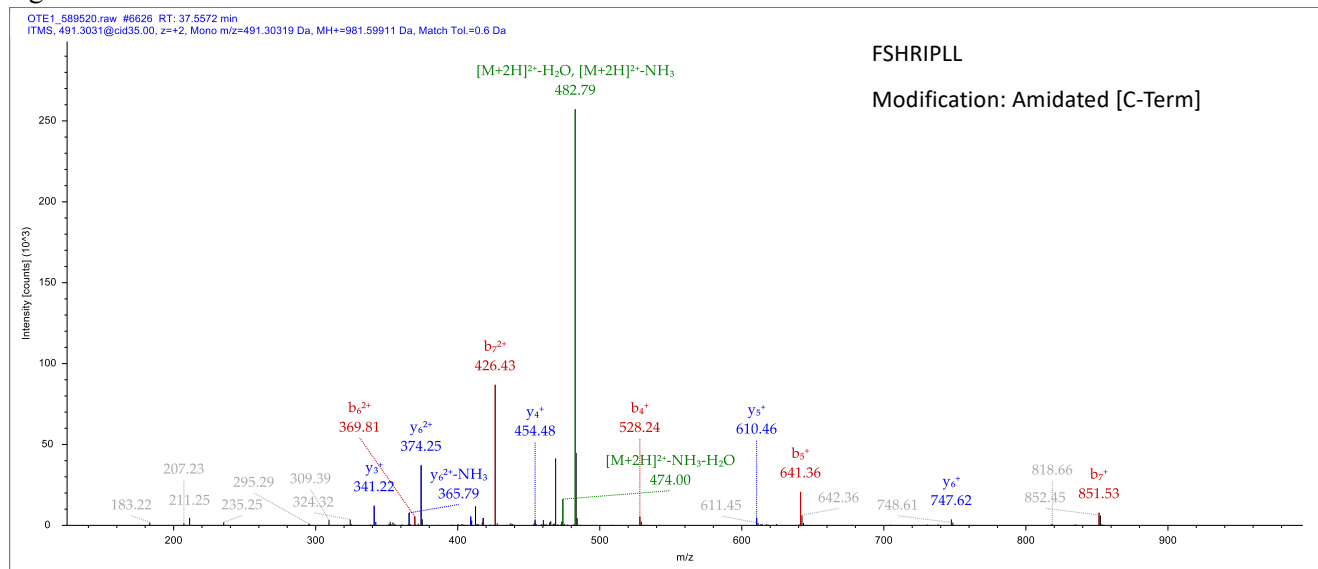

Figure S5

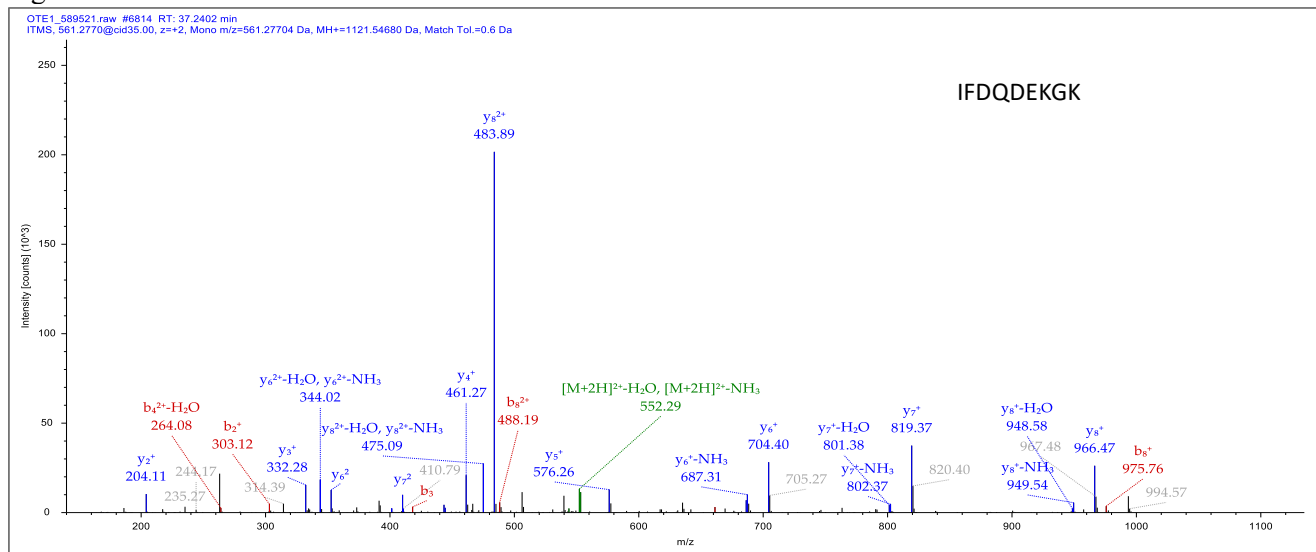

Figure S6

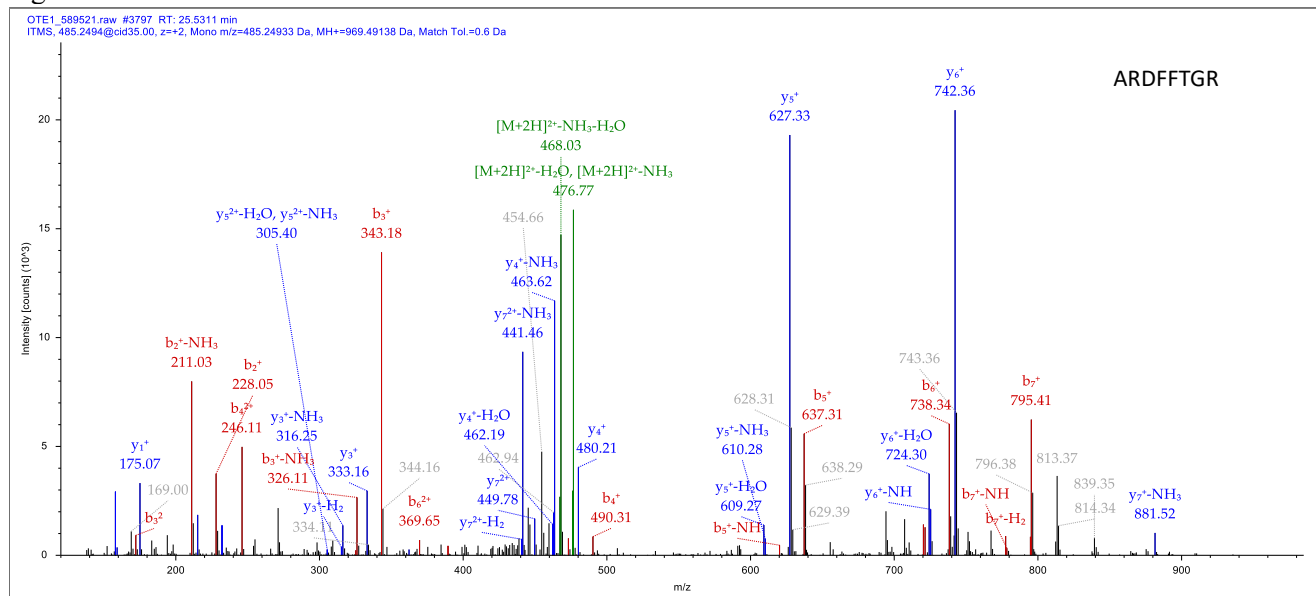

Figure S7

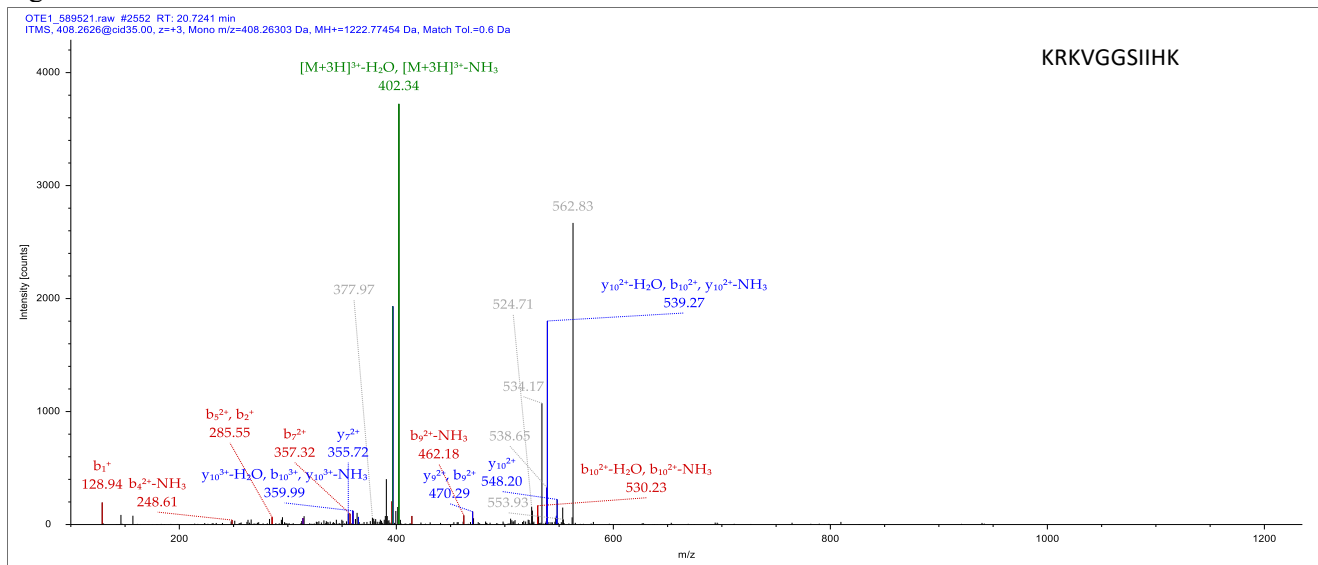

Figure S8. Homology model and docking results for plasmin cleavage centres. *a*. 3D model of the human  $\gamma$  ENaC generated by I-TASSER. *b*. The GRIP domain (aa114-239) of the human  $\gamma$  ENaC model with three positively charged residue clusters facing outward and highly accessible. Four P strands are composed of following amino acids: P1, aa160-166; P2, aa182-190; P3, aa199-208; and P4, aa213-219. Three cleavage centres were highlighted. *c*. The interaction of plasmin (chain A with surface presentation) with textilinin-1 (chain C) from the original crystal structure 3uir highlighted with two arginine residues in the substrate interacting with plasmin. *d*. Detailed interactions between two arginine residues and plasmin: Arg17 interacting with Asp735, Ser741, and Gly764; Arg19 interacting with Glu687 and Phe587. We used this as a docking guide as attractors (Asp735 and Gly764). The colour of the substrate in *d*, *f*, and *h* is set yellow for clarity. *e*. Docking result with 178RKRR in the  $\gamma$  ENaC as attractors to the plasmin, showing that two arginine residues Arg178 and Arg180 docked to the plasmin to the similar positions in *c*. *f*. The detailed interactions of Arg178 and Arg180 with the plasmin: Arg178 interacting with Asp735 and other residues (Tyr774, Gln738); Arg180 interacting with Glu623, His586. *g*. Docking result with 135RKRR in the  $\gamma$  ENaC as attractor to the plasmin active centre also resulted in two arginine residues (Arg137 and Arg135) interacting with the plasmin active centre. *h*. The detailed interactions of Arg137 and Arg135 with the plasmin residues as shown.

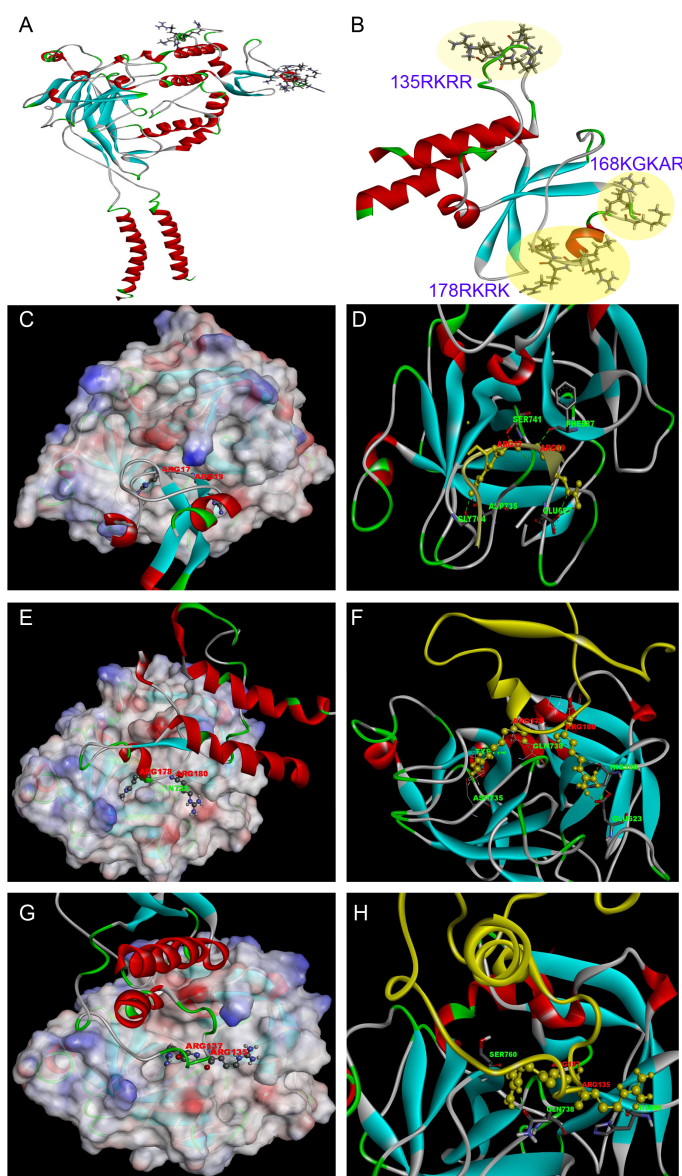

Figure S9. Plasmin regulates ENaC activity via G protein. *a.* ENaC activity in the absence (Control) of two-chain urokinase plasminogen activator (tc-uPA,  $10 \mu\text{g}\cdot\text{ml}^{-1}$ , 30 min at room temperature) and plasmin ( $10 \mu\text{g}\cdot\text{ml}^{-1}$ , 30 min at room temperature) and presence of protease and Gi/o protein antagonist, pertussis toxin (PTX,  $2 \mu\text{g}\cdot\text{ml}^{-1}$ , 24 hr prior to addition of proteases at  $20^\circ\text{C}$ ).  $n = 12$ . NS, not significant; \* $P < 0.05$  and \*\* $P < 0.01$ , respectively, correspondingly vs those before application of proteases. *b.* Normalized ENaC activity. \*\*  $P < 0.01$  vs that in the absence of PTX.  $n = 12$ .

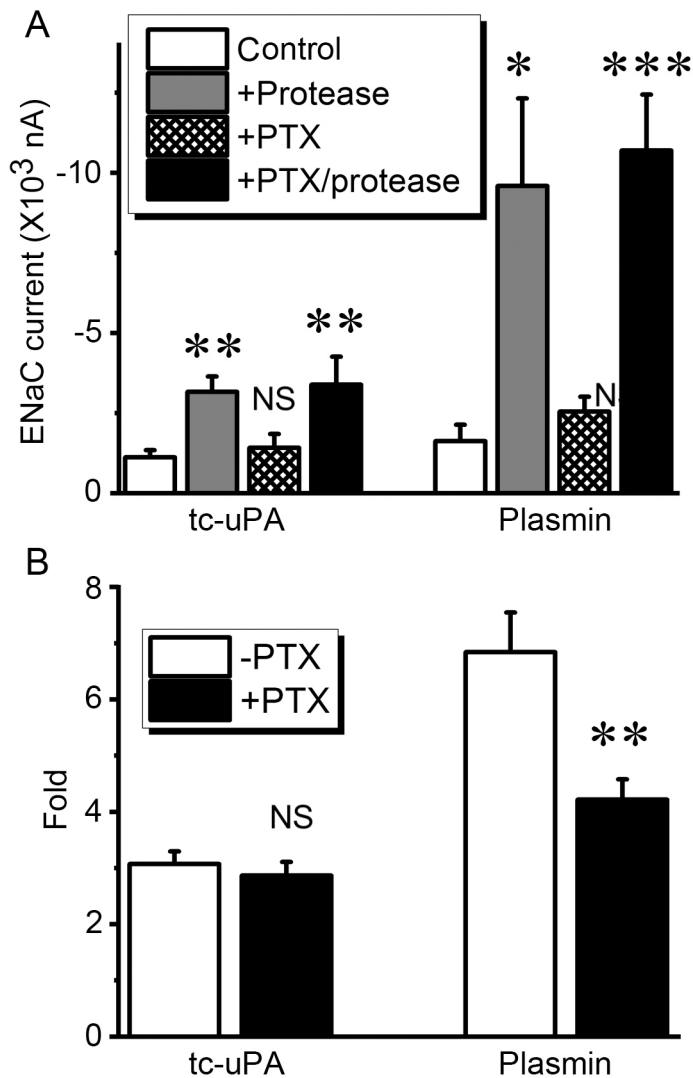

Supplement: BPH-177-3091-s001.pdf [file BPH-177-3091-s001.pdf]
